# Supplementary material for: Silver-decorated palladium on carbon catalyst for enhanced ammonium formate dehydrogenation
Source: Royal Society of Chemistry journal article supplement (doi:10.1039/d3cy01057k), 2023-12-08
Supplement: d3cy01057k1.pdf [file d3cy01057k1.pdf]

## Supporting Information

### Silver-decorated Palladium on Carbon Catalyst for Enhanced Ammonium Formate Dehydrogenation

Zhun Dong <sup>a</sup>, Ahmad Mukhtar <sup>a</sup>, Thomas Ludwig <sup>b</sup>, Sneha A. Akhade <sup>b</sup>, Wenda Hu <sup>a, c</sup>, Jian Zhi Hu <sup>a, c</sup>, Katarzyna Grubel <sup>d</sup>, Mark Engelhard <sup>e</sup>, Brandon C. Wood <sup>b</sup>, Tom Autrey <sup>d</sup>, Hongfei Lin <sup>a\*</sup>

<sup>a</sup> Gene and Linda Voiland School of Chemical Engineering and Bioengineering, Washington State University, Pullman, WA 99163, United States.

<sup>b</sup> Materials Sciences Division, Lawrence Livermore National Laboratory (LLNL), Livermore, CA 94550, United States.

<sup>c</sup> Institute for Integrated Catalysis, Pacific Northwest National Laboratory (PNNL), Richland, WA 99352, United States.

<sup>d</sup> Energy and Environment Division, Pacific Northwest National Laboratory (PNNL), Richland, WA 99352, United States.

<sup>e</sup> Environmental & Molecular Sciences, Earth & Biological Sciences, Pacific Northwest National Laboratory (PNNL), Richland, WA 99352, United States.

\*Corresponding author: [hongfei.lin@wsu.edu](mailto:hongfei.lin@wsu.edu)

**TOF calculation:**

$$TOF = \frac{\text{moles of } H_2 \text{ formed at a certain reaction time}}{(\text{total moles of Pd atom}) \times \text{reaction time}} \quad (1)$$

Where, the reaction time is 10 min; total moles of Pd is calculated from Pd loading in the catalyst.

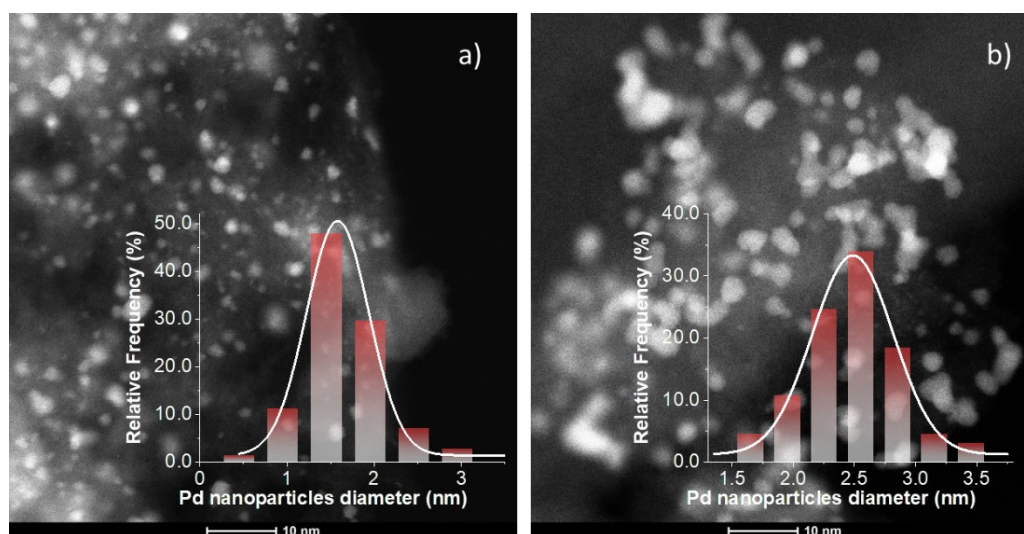

**Figure S1.** TEM images of a) Pd3Ag10/ACA-G, b) Pd3Ag10/ACA-C, and corresponding nanoparticles size distributions.

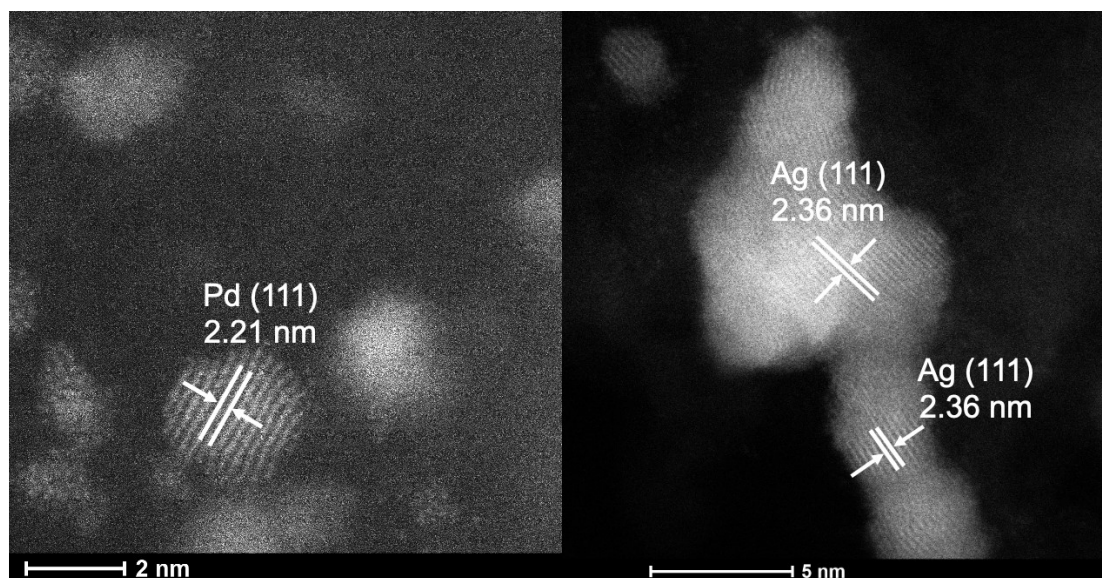

**Figure S2.** HAADF images for Pd3Ag10/ACA-G (Left) and Pd3Ag10/ACA-C (Right).

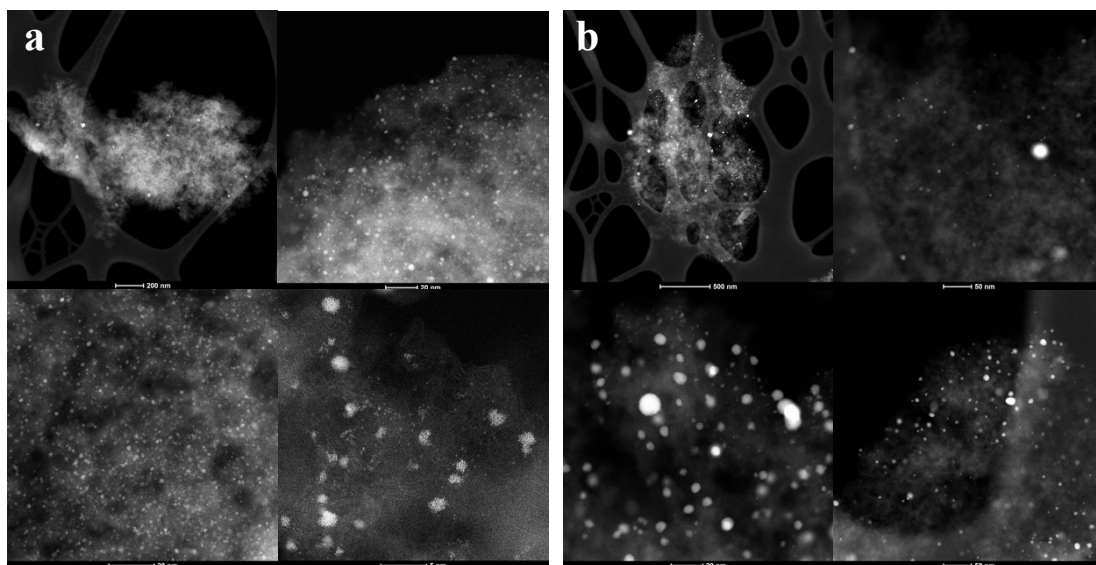

Figure S3. HAADF-STEM images of Pd5/ACA(a) and Ag3/ACA(b).

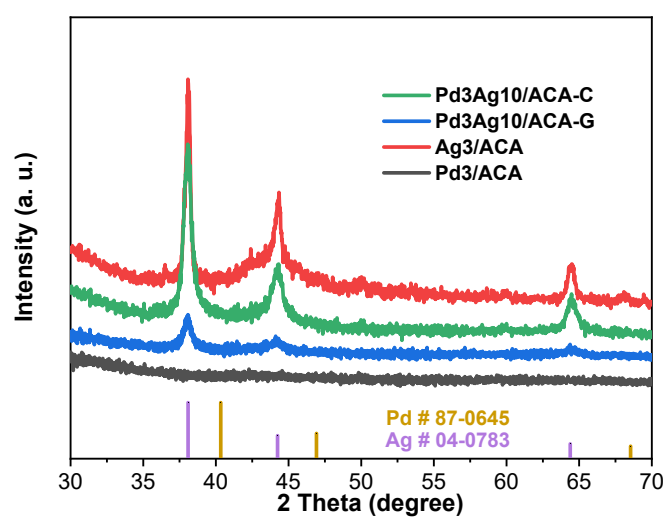

Figure S4. XRD spectra of Pd3/ACA, Ag3/ACA, Pd3Ag10/ACA-G, and Pd3Ag10/ACA-C catalyst.

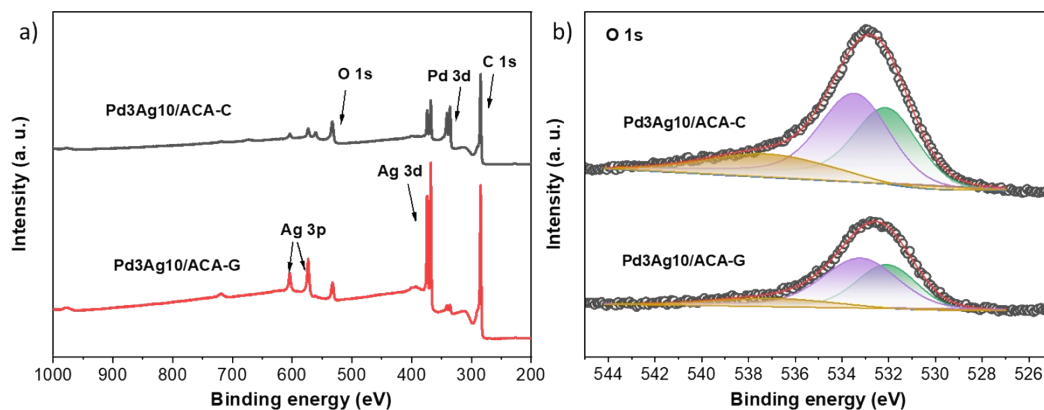

**Figure S5.** XPS spectra of Pd3Ag10/ACA-G and Pd3Ag10/ACA-C. A) Scan survey. B) O 1s.

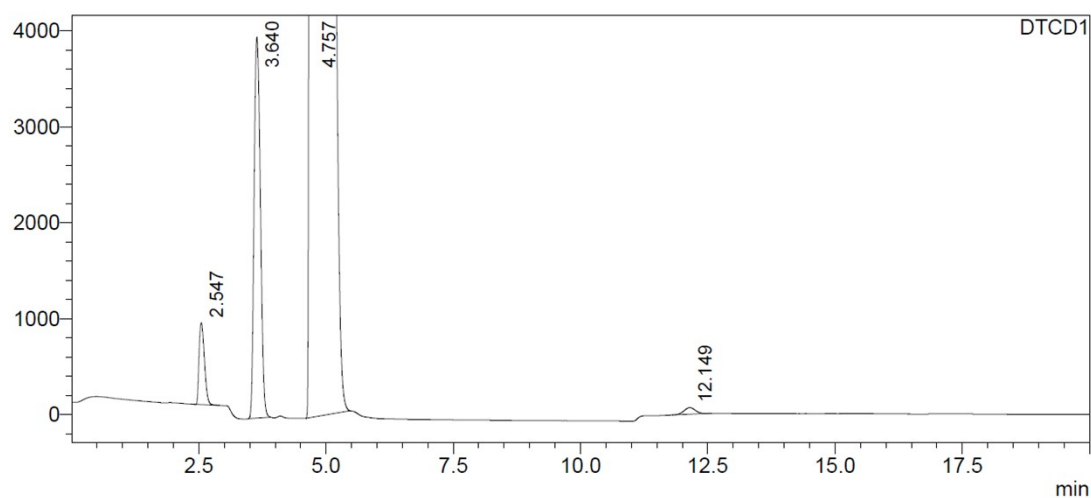

**Figure S6.** GC spectra of gas phase product after dehydrogenation of ammonium formate.

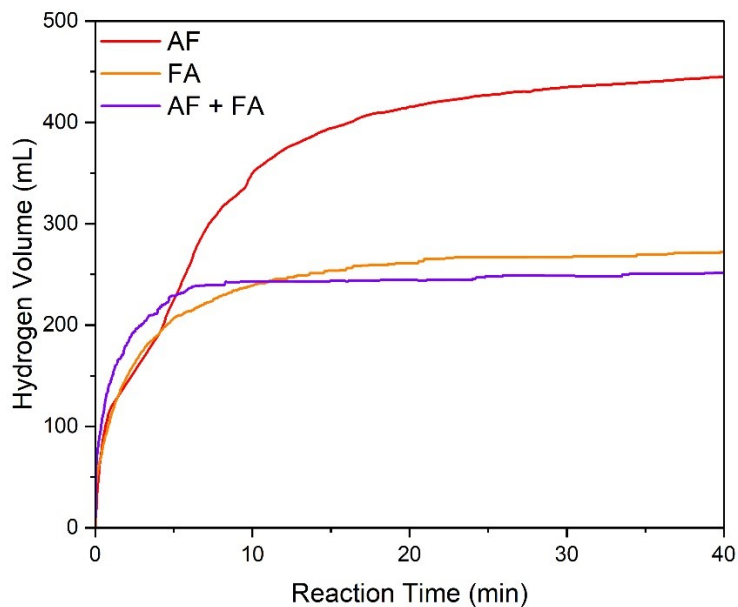

**Figure S7.** Dehydrogenation of ammonium formate (AF), formic acid (FA), and their mixtures (AF + FA, 50:50) over Pd3Ag10/ACA catalyst. Reaction Conditions: reactants (1M, 20 mL), Catalyst loading (50 mg), Reaction temperature (80 °C), and Stirring speed (500 rpm).

**Table S1.** Gas product component tested by GC-TCD.

| Ret. Time | Area    | Height | Gas             | Calibration peak area (1 v%) | Concentration (%) |
|-----------|---------|--------|-----------------|------------------------------|-------------------|
| 2.548     | 6284    | 854    | H <sub>2</sub>  | 451                          | 99.6              |
| 3.640     | 34069   | 3970   | O <sub>2</sub>  | -                            | -                 |
| 4.757     | 1280681 | 69908  | N <sub>2</sub>  | -                            | -                 |
| 12.149    | 1092    | 69     | CO <sub>2</sub> | 17645                        | 0.4               |

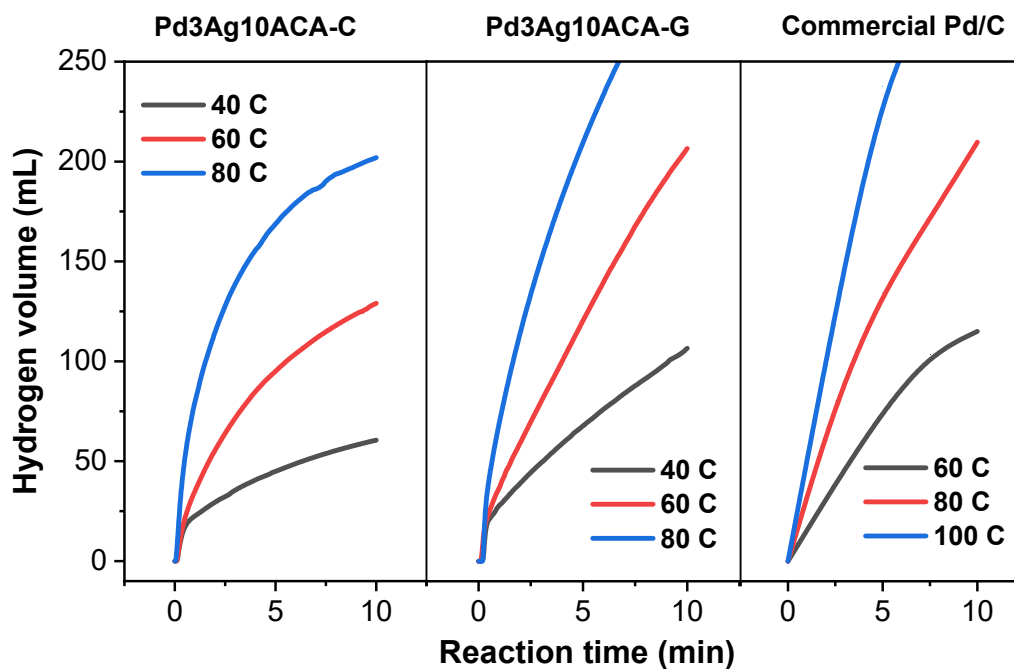

**Figure S8.** Comparison of the dehydrogenation activity of the commercial Pd/C, Pd3Ag10/ACA-C, and Pd3Ag10/ACA-G at different reaction temperatures.

**Table S2.** Calculated TOFs of Pd3Ag10/ACA-G at different temperatures

| Temperature (°C) | TOF (h <sup>-1</sup> ) |
|------------------|------------------------|
| 40               | 1799                   |
| 60               | 3487                   |
| 80               | 5202                   |

**Table S3.** Calculated TOFs of Pd3Ag10/ACA-G during stability test.

| Runs | TOF (h <sup>-1</sup> ) |
|------|------------------------|
| 1    | 5202                   |
| 2    | 4864                   |
| 3    | 4340                   |
| 4    | 3884                   |
| 5    | 3242                   |

**Table S4.** Pd dispersion in the catalysts of fresh Pd3Ag10/ACA-G, spent Pd3Ag10/ACA-G after 1<sup>st</sup> run, and spent Pd3Ag10/ACA-G after 3<sup>rd</sup> run and Pd and Ag loading (wt%) tested by ICP-MS.

| Catalysts                 | Pd dispersion (%) | Pd loading (%) | Ag loading (%) |
|---------------------------|-------------------|----------------|----------------|
| Fresh Pd3Ag10/ACA-G       | 21.4              | 3.01           | 9.83           |
| After 1 <sup>st</sup> run | 19.2              | -              | -              |
| After 3 <sup>rd</sup> run | 17.9              | 3.00           | 9.92           |

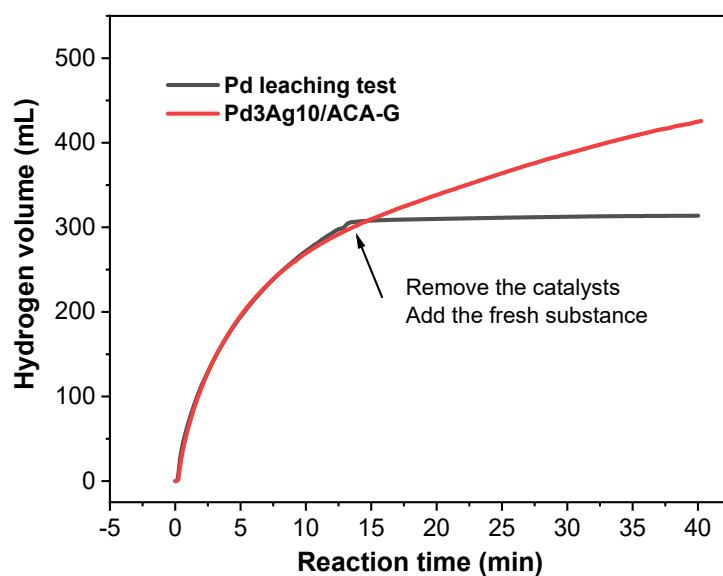

**Figure S9.** Hot filtration curves of formate dehydrogenation over Pd3Ag10/ACA-G. Reaction conditions: 20 mmol ammonium formate, 80 °C, 350 rpm, and 1 atm N<sub>2</sub>.

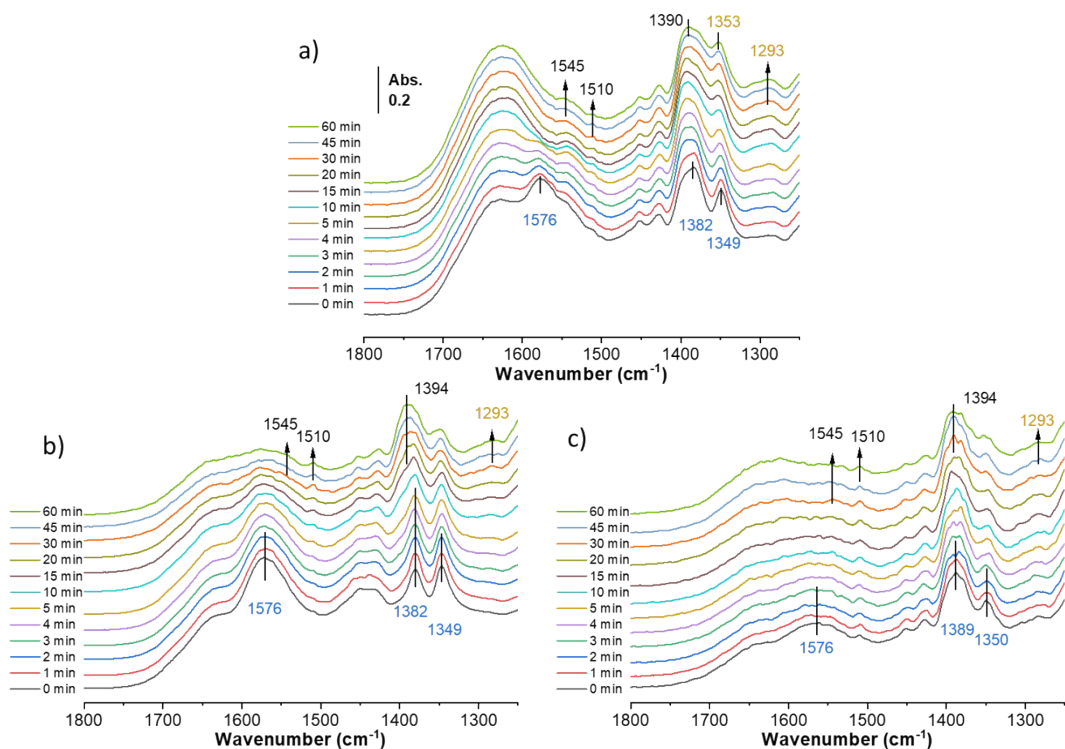

**Figure S10.** Selected in-situ ATR-IR spectra over Pd<sub>3</sub>Ag<sub>10</sub>/ACA-G at different temperatures A): 25 °C, B) 60 °C, and C) 80 °C, as a function of time recorded after rinsing a 2 M ammonium formate solution to the spectral cell. The reference spectrum was recorded in the air before the rinse.

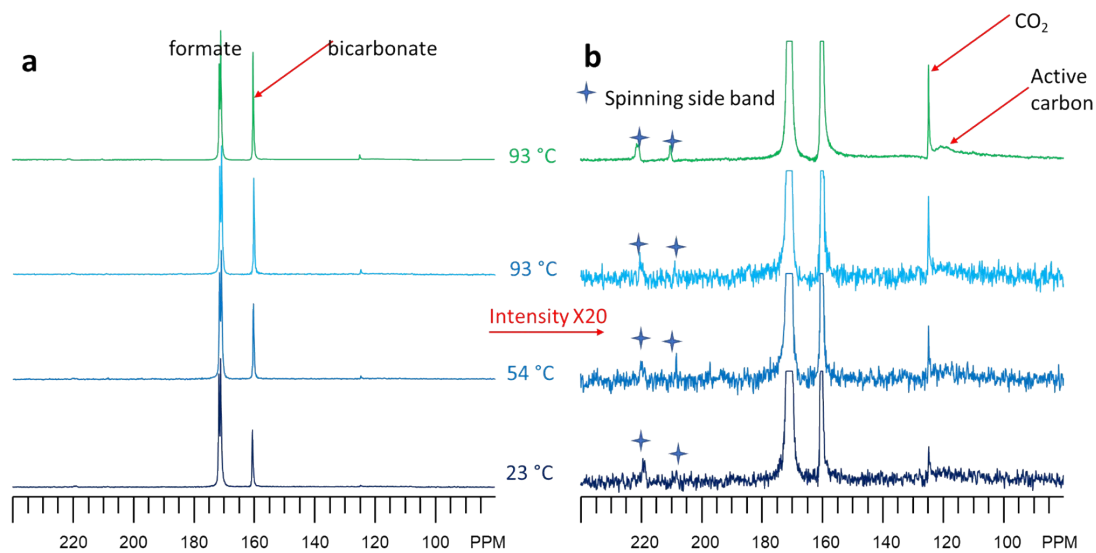

**Figure S11.** Operando <sup>13</sup>C single pulses NMR spectra of formate to bicarbonate reaction over Pd/Ag/AC catalyst (a) full spectra at various reaction temperatures; (b) intensity vertically expanded by 20 times.

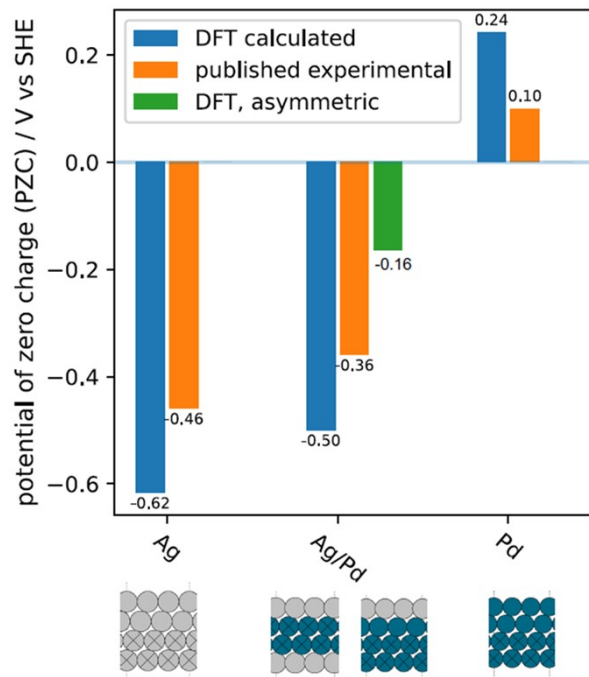

**Figure S12.** PZC of Pd, Ag, and Pd-Ag bimetallic surface calculated with DFT and comparison with publications.
